# Supplementary material for: A CT-Based Clinical, Radiological and Radiomic Machine Learning Model for Predicting Malignancy of Solid Renal Tumors (UroCCR-75)
Source: MDPI journal article supplement (doi:10.3390/diagnostics13152548), 2023-07-31
Supplement: s1 [file s1]

## SUPPLEMENTAL TABLE

Supplemental Table. Full list of the 35 radiomic features extracted based on Kendall's correlation coefficient.

| Radiomic Feature                                       |                                                      |
|--------------------------------------------------------|------------------------------------------------------|
| Area.density...aligned.bounding.box                    | Morphological features                               |
| Area.density...convex.hull                             | Morphological features                               |
| Area.density...oriented.bounding.box                   | Morphological features                               |
| Centre.of.mass.shift..cm.                              | Morphological features                               |
| Flatness                                               | Morphological features                               |
| Inverse.elongation                                     | Morphological features                               |
| Spherical.disproportion                                | Morphological features                               |
| Volume.density...aligned.bounding.box                  | Morphological features                               |
| Volume.density...enclosing.ellipsoid                   | Morphological features                               |
| Volume.density...oriented.bounding.box                 | Morphological features                               |
| Number.of.grey.levels                                  | General features                                     |
| Intensity.histogram.coefficient.of.variation           | Intensity histogram features                         |
| X90th.discretised.intensity.percentile                 | Intensity histogram features                         |
| Intensity.mean.value                                   | Intensity-based statistical features                 |
| Max.value                                              | Intensity-based statistical features                 |
| Number.of.compartments..GMM.                           | Intensity-based statistical features                 |
| Intensity.based.interquartile.range..Original.Data.    | Intensity-based statistical features (Original data) |
| Min.value..Original.Data.                              | Intensity-based statistical features (Original data) |
| Skewness..Original.Data.                               | Intensity-based statistical features (Original data) |
| Volume.at.intensity.fraction.10.                       | Intensity-volume histogram features                  |
| Volume.at.intensity.fraction.90.                       | Intensity-volume histogram features                  |
| Volume.fraction.difference.between.intensity.fractions | Intensity-volume histogram features                  |
| Global.intensity.peak                                  | Local intensity features                             |
| Local.intensity.peak                                   | Local intensity features                             |
| Cluster.shade                                          | Grey level co-occurrence based features              |
| Correlation                                            | Grey level co-occurrence based features              |
| Grey.level.variance..GLDZM.                            | Grey level distance zone based features              |
| Large.distance.low.grey.level.emphasis                 | Grey level distance zone based features              |
| Small.distance.emphasis                                | Grey level distance zone based features              |
| Small.distance.high.grey.level.emphasis                | Grey level distance zone based features              |
| Small.distance.low.grey.level.emphasis                 | Grey level distance zone based features              |
| Small.zone.emphasis                                    | Grey level size zone based features                  |
| Zone.size.entropy                                      | Grey level size zone based features                  |
| High.dependence.high.grey.level.emphasis               | Neighbourhood grey tone difference based features    |
| High.dependence.low.grey.level.emphasis                | Neighbourhood grey tone difference based features    |

GMM, Gaussian mixture model; GLDZM, grey level distance zone matrix.
